# Supplementary material
Source: PubMed Central journal article supplement (PMC2782289)
Supplement: tpc.109.066936_1.pdf [file tpc.109.066936_1.pdf]

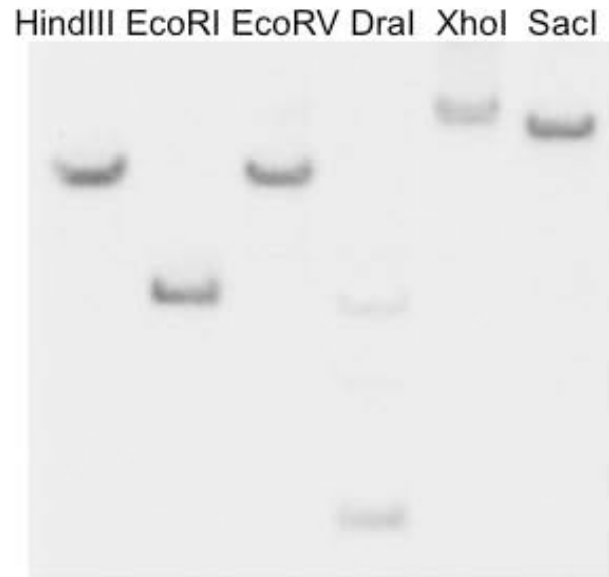

**Supplemental Figure 1. *TAGL1* hybridization to tomato genomic DNA.** Wild-type tomato genomic DNA (Ailsa Craig) was digested with the indicated six restriction enzymes and the resulting DNA gel-blot hybridized to a probe representing the *TAGL1* RNAi sequence. The *TAGL1* probe sequence includes an internal *DraI* restriction site that explains 2 bands in the *DraI* lane.

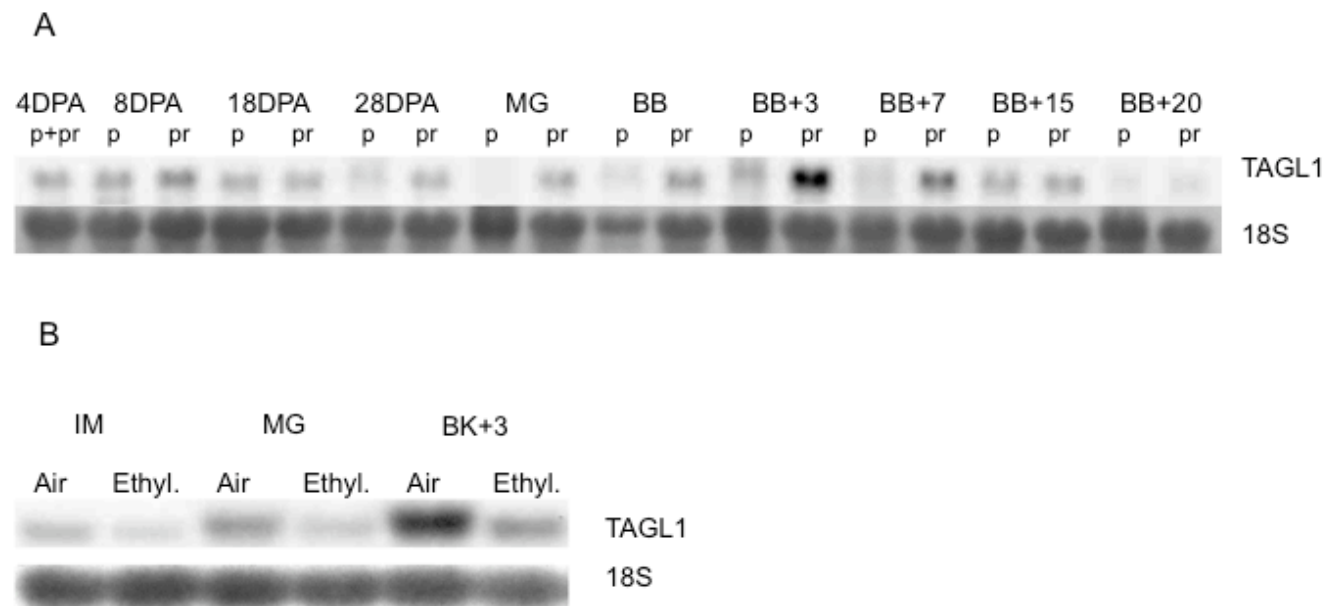

**Supplemental Figure 2.**

**Total RNA gel-blot analysis of *TAGL1* and *18S* rRNA (control)**

- A.** Expression of the *TAGL1* gene in pulp and pericarp of developing tomato fruit . Total fruit RNA isolated from pulp (p) and pericarp (pr) was analyzed via gel-blot analysis from the wild-type cultivar Ailsa Craig at the indicated fruit stages. Only at the 4 days post-anthesis stage (4DPA) was RNA isolated from the whole fruit (p+pr) due to the difficulty in separating the tissues at this young stage.
- B.** Expression of the *TAGL1* gene in response to exogenous ethylene treatment. Total RNA was isolated from from wild-type cultivar Ailsa Craig fruit at IM (immature stage, 28DPA), MG (mature green) and BK+3 (3 days post-breaker ) treated with air or 20ppm ethylene (Ethyl).

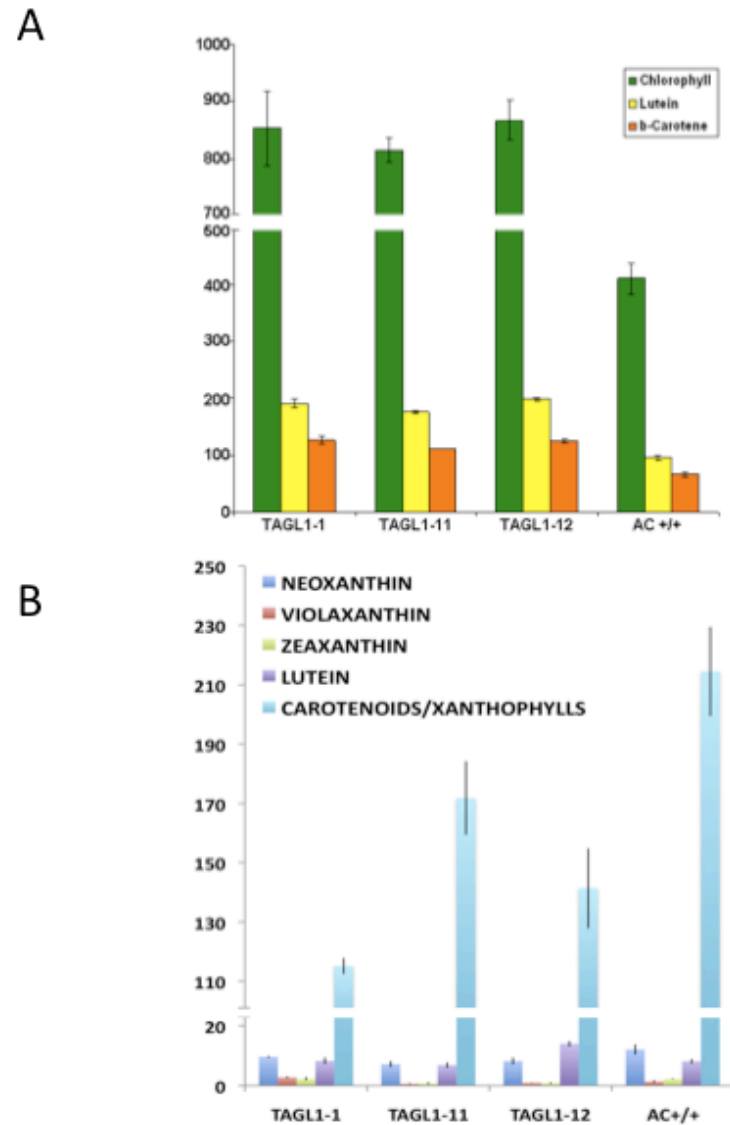

**Supplemental Figure 3. Chlorophyll and carotenoid accumulation in sepal and petals of *TAGL1* repressed lines.** Three individual pools of separated anthesis stage sepals and petals were harvested and frozen in liquid nitrogen. All values reflect percentages of non-transformed controls and are derived from duplicate samplings of each of the three pooled samples for a total of six data points per sample. **A)** HPLC analysis of the major sepal pigments, chlorophyll, lutein and  $\beta$ -carotene. **B)** HPLC of the predominant petal pigments in addition to analysis of total carotenoids.

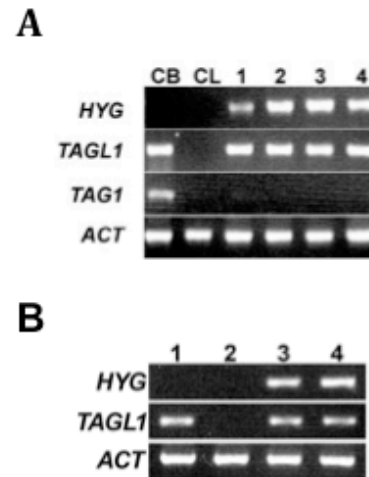

**Supplemental Figure 4. *TAGL1* expression in *TAGL1* overexpression lines.**

(A) *TAGL1* expression levels in *TAGL1* overexpression lines generated in the cultivar Microtom. RT-PCR in control buds at anthesis (CB), control leaves (CL) and leaves from four *35S::TAGL1* lines, of *HYG* (Hygromycin antibiotic resistance marker), *TAGL1*, *TAG1* and *ACT* (actin). *TAG1* levels are unaffected in the *35S::TAGL1* lines.

(B) Sepal expression at different stages. RT-PCR on control buds at anthesis (1), WT sepals (2), *35S::TAGL1* green sepals (3) and *35S::TAGL1* red sepals (4). In *35S::TAGL1* plants, *TAGL1* expression is consistently high in sepals throughout development.

**Supplemental Table 1. List of species and accession numbers of coding regions used for phylogenetic analysis.**

| Species                           | Loci      | Accession # |
|-----------------------------------|-----------|-------------|
| <b>Asterids</b>                   |           |             |
| <i>Antirrhinum majus</i>          | PLENA     | S53900      |
|                                   | FARINELLI | AJ239057    |
| <i>Petunia hybrida</i>            | FBP6      | X68675      |
|                                   | PMADS3    | X72912      |
|                                   | FBP7      | X81651      |
|                                   | FBP11     | X81852      |
| <i>Petunia inflata</i>            | PAGL1     | L33973      |
| <i>Nicotiana tabacum</i>          | NAG       | L23925      |
|                                   | PLE36     | U63163      |
| <i>Solanum lycopersicon</i>       | TAG1      | L26295      |
|                                   | TAGL1     | AY098735    |
|                                   | TAGL11    | AY098736    |
|                                   | MBP3      | TC156476    |
| <i>Daucus carota</i>              | DcMADS4   | AJ271150    |
| <i>Panax ginseng</i>              | GAG2      | Z46612      |
| <i>Gerbera hybrida</i>            | GAGA1     | AJ009722    |
|                                   | GAGA2     | AJ009723    |
| <i>Helianthus annuus</i>          | HaAG      | AY157724    |
|                                   | HAM59     | AY173068    |
| <i>Chrysanthemum x morifolium</i> | CDM37     | AY173059    |
| <i>Ipomoea nil</i>                | CDNA      | AB006182    |
|                                   | CDNA2     | AB006183    |
| <i>Eustoma grandiflorum</i>       | MADS1     | AY522501    |
| <b>Rosids</b>                     |           |             |
| <i>Arabidopsis thaliana</i>       | AG        | X53579      |
|                                   | SHP1      | M55550      |
|                                   | SHP2      | M55553      |
|                                   | STK       | U20182      |
| <i>Brassica napus</i>             | BnSHP1    | AY036062    |
|                                   | BAG1      | M99415      |
| <i>Brassica rapa</i>              | AG        | AY162471    |
| <i>Cucumis sativus</i>            | CAG1      | AF022377    |
|                                   | CAG2      | AF022378    |
|                                   | CAG3      | AF022379    |
|                                   | M1        | AJ312773    |
| <i>Rosa rugosa</i>                | D1        | AB025643    |
|                                   | C1        | AB025644    |
|                                   | C2        | AB025645    |
|                                   | C3        | AB025646    |
| <i>Rosa hybrida</i>               | RAG       | U43372      |
| <i>Malus domestica</i>            | MdMADS14  | AJ251117    |
|                                   | MdMADS15  | AJ251118    |
|                                   | MdMADS10  | AJ000762    |
|                                   | AGL       | AF401637    |

|                                |          |          |
|--------------------------------|----------|----------|
| <i>Juglans regia</i>           | JrAG     | AJ313088 |
| <i>Corylus avellana</i>        | CaMADS1  | AF027376 |
| <i>Betula pendula</i>          | BpMADS6  | AJ252071 |
| <i>Gossypium hirsutum</i>      | AP3L     | AY083173 |
|                                | GhMADS2  | AF538966 |
| <i>Fragaria x ananassa</i>     | STAG     | AF168468 |
| <i>Populus trichocarpa</i>     | PTAG1    | AF052570 |
|                                | PTAG2    | AF052571 |
|                                | PtMADS43 | EEE99912 |
|                                | PtMADS51 | EEE78119 |
| <i>Momordica charantia</i>     | McAG     | AY178837 |
| <b>Vitaceae</b>                |          |          |
| <i>Vitis vinifera</i>          | VvMADS1  | AF265562 |
|                                | VvMADS5  | AF373604 |
| <b>Caryophyllales</b>          |          |          |
| <i>Silene latifolia</i>        | SLM1     | X80488   |
| <i>Rumex acetosa</i>           | RAP1     | X89107   |
| <i>Phytolacca americana</i>    | PhaAG1   | AY464093 |
|                                | PhaAG2   | AY464118 |
| <b>Saxifragales</b>            |          |          |
| <i>Saxifraga caryana</i>       | SxcAG1   | AY464117 |
|                                | SxcAG2   | AY464116 |
| <i>Liquidamber styraciflua</i> | LAG      | AF103903 |
| <b>Sabiaceae</b>               |          |          |
| <i>Meliosma dilleniifolia</i>  | MdAG2    | AY464105 |
| <b>Ranunculales</b>            |          |          |
| <i>Ranunculales ficaria</i>    | RfAG1    | AY464114 |
|                                | RfAG2    | AY464115 |
| <i>Helleborus orientalis</i>   | HoAG1a   | AY464109 |
|                                | HoAG1b   | AY464108 |
| <i>Clematis integrifolia</i>   | CliAG1   | AY464113 |
|                                | CliAG2   | AY464112 |
| <i>Aquilegia alpina</i>        | AqaAG1   | AY464111 |
|                                | AqaAG2   | AY464110 |
| <i>Thalictrum dioicum</i>      | TdAG1    | AY464095 |
|                                | ThdAGL2  | Ay464094 |
| <i>Berberis gilgiana</i>       | BgAG     | AY464106 |
| <i>Akebia quinata</i>          | AkqAG    | AY464107 |
| <i>Sanguinaria canadensis</i>  | ScAG     | AY464097 |
| <b>Magnoliales</b>             |          |          |
| <i>Magnolia precossimina</i>   | MpMADS2  | AB050644 |

|                               |          |          |
|-------------------------------|----------|----------|
|                               | MpMADS11 | AB050653 |
| <b>Piperales</b>              |          |          |
| <i>Saruma henryii</i>         | SrhAG    | AY464101 |
| <i>Houttuynia cordata</i>     | HtcAG    | AY464096 |
| <i>Asarum caudigerum</i>      | MADS544  | AJ419958 |
| <b>Chloranthaceae</b>         |          |          |
| <i>Chloranthus spicatus</i>   | CsAG1    | AY464100 |
|                               | CsAG2    | AY464099 |
| <b>Liliales</b>               |          |          |
| <i>Lilium longiflorum</i>     | AG1      | AY500376 |
|                               | AG2      | AY500377 |
|                               | MADS2    | AY522502 |
| <b>Asparagales</b>            |          |          |
| <i>Phalaenopsis equestris</i> | PeMADS1  | AF234617 |
| <i>Hyacinthus orientalis</i>  | HAG1     | AF099937 |
|                               | MADS1    | AF194335 |
| <i>Agapanthus praecox</i>     | ApMADS2  | AB079260 |
| <i>Asparagus virgatus</i>     | AVAG1    | AB125347 |
| <i>Crocus sativus</i>         | AG1      | AY555579 |
| <b>Poales</b>                 |          |          |
| <i>Hordeum vulgare</i>        | HvAG1    | AF486648 |
|                               | HvAG2    | AF486649 |
| <i>Triticum aestivum</i>      | WAG      | AB084577 |
| <i>Oryza sativa</i>           | OsMADS3  | L37528   |
|                               | OsMADS13 | AF151693 |
|                               | RMADS207 | AY551913 |
|                               | RMADS206 | AY551912 |
| <i>Zea mays</i>               | ZAG1     | L18924   |
|                               | ZAG2     | L18925   |
|                               | ZMM1     | X81199   |
|                               | ZMM23    | AJ430637 |
|                               | ZMM25    | AJ430639 |
|                               | AG       | L81162   |
|                               | MAF1     | AY332475 |
| <b>Nymphaeales</b>            |          |          |
| <i>Nymphaea sp.</i>           | NymAG1   | AY464104 |
|                               | NymAG2   | AY464103 |
|                               | NymAG3   | AY464102 |
| <b>Ginkgoales</b>             |          |          |
| <i>Ginkgo biloba</i>          | M5       | AY114304 |
| <b>Cycadales</b>              |          |          |
| <i>Cycas edentata</i>         | AG       | AF492455 |

**Gnetales***Gnetum gnemon*

GGM3

AJ132219

**Coniferales***Picea mariana*

SAG1

U69482

*Pinus resinosa*

MADS

AF006210



## Supplemental Table 2. DNA Primer Sequences.

18SF

5'-CTGGTTGATCCTGCCAGTAGT-3'

18SR

5'GGTTGAGGTACGCAAACCTG-3'

35S2

5'-CCTCTATATAAGGAAGTTCATTTCA-3'

ACO1F

5'-ACCO1TGATCCAATTGCAAGTGCTTAG-3'

ACO1R

5'-TGATACATATGCAGCAAATCACA-3'

ACS2F

5'-GAGGTTTCGTAGGTGTTGAGAAAAG-3'

ACS2R

5'-GAACTAATGGTGAGGGAGGAATAG-3'

ACS4F

5'-CGATGATCAAACAATGGAGATCGCACTTG-3'

ACS4R

5'-CAATAATTTTGTGGCTCGCACTA-3'

ACT1

5'-GATGGATCCTCCAATCCAGACACTGTA-3'

ACT2

5'-GTATTGTGTTGGACTCTGGTGATGGTGT-3'

cLEG9L5For

5'-GCAGAACGCCAACATGTATCTA-3'

cLEG9L5Rev

5'-CATTCTTAATTAACAGATGACTGAAT-3'

CNRF

5'-CTGTCAATTCCCGGATTTCTAA-3'

CNRR

5'-ACCTCATAAAGTGAGTTGGAATGTC-3'

CYC-BF

5'- GGCTCAATTGACGTGATCA-3'

CYC-BR

5'- AGAGTGGTGAAGGGTCAACACA-3'

E4F

5'-ACCAGCAATATCTAGAGAAGGGTG-3'

E4R

5'-ATCATTGTCATGTTTATTCAAATTTAAAG-3'

E8F

5'-GAATAAGAATAATAATGTTATCTATTATTAC-3'

E8R

5'-ATGTAATATTATTTAATGTTTTAAACAAC-3'

HB1F

5'-GTTGTTTCATTGATGGAAAAGTTACA-3'

HB1R

5'-ACGACACTTATTTTCATCATACAAAGC-3'

HYG1-F

5'-GTTGCGTCCGTCATCTACTCTATTC-3'

HYG1-R

5'-TCGGCTCCAACAATGTCCTGAC-3'

LSUF

5'-ATAATTGACAAGAACGCAAAGATAGG-3'

LSUR

5'-GTTTCATCAAGTCCAAGAAAGTGAAT-3'

LYC-BF

5'- CGAAATCCATGTTGATATGCAA-3'

LYC-BR

LCY-B Rev 5'- GAACAAGAGATCTAGAGAAGCCAG-3';

NRF

5'-AGGTAACATTTGGATTGAGAGTGAGG-3'

NRR  
5'-CTCCAGTACTCACTTTACGAGCATTG-3'

PG2AF  
5'-ACAAACTTTCCATGTGAAGGAATTA-3'

PG2AR  
5'-TATACAAAAGAGCTTCATCCTCTGAA-3'

PGMF  
5'-AAGTTAATAAAGGGAATCCGTTTCTGAA-3'

PGMR  
5'-ACATTTCAAACCTCCAGACAGAAGAGT-3'

PSY1F  
5'-TCAGAATGTCTGTTGCCTTGTTA-3'

PSY1R  
5'-TGGTAGATCTCAGTTGCCTCTTC-3'

RINF  
5'-ATTCATCATTGAGGCAAATTAGGT-3'

RINR  
5'-ATACTCCAAATTCAAAGCATCCAT-3'

SAIF  
5'-TATGGTAGTTCAGTACCTGTGTTGGA-3'

SAIR  
5'-TGCATATATTTGCTGAGCTTTCTTAG-3'

SSYF  
5'-GTCGGATTTAATGTTCCAGTTTCTC-3'

SSYR  
5'-TGTATCTCGTTTGCATTTTTACTTGA-3'

SHP1FL-F  
5'-AGTCATCTAGAATGGAGGAAGGTGGGAGTAG-3'

SHP1FL-R  
5'-TGCATGGATCCTTACACAAGTTGAAGAGGAG-3'

SHP2FL-F

5'-AGTCATCTAGAATGGAGGGTGGTGCGAGTAA-3'

SHP2FL-R

5'-TGCATGGATCCTCAAACAAGTTGCAGAGGTG-3'

TAG1-F

5'-AGCTCTTGCTGGAATGAAAC-3'

TAG1-R

5'-AAGCTCATGATAGTTTGATG-3'

TAGL1-F

5'-GCATTGGGCAGTTTAAGCCC-3'

TAGL1-R

5'-TCGCGACGAGAGTAATGAGG-3'

TAGL1FLFB1

5'GGGGACAAGTTTGTACAAAAAAGCAGGCTTCATGGTTTTTCCTATTAATCA-3'

TAGL1FLR-B2

5'GGGGACCACTTTGTACAAGAAAGCTGGGTCTCAGACAAGCTGGAGAGGAG-3'

TAGL1FL-F

5'-AGTCATCTAGAATGGTTTTTCCTATTAATCA-3'

TAGL1FL-R

5'-TGCATGGATCCTCAGACAAGCTGGAGAGGAG-3'

TAGL1FLF0

5'-ATGGTTTTTCCTATTAATCA-3'

TAGL1R7

5'-CTTAATACGACTCACTATAGGGCATTGCTCTTGCTCTCT-3'

TAGL1UR7

5'-CTTAATACGACTCACTATAGGGGCATATTATTTATATAAGGC-3'

TDR4F

5'-AGAGGTGGCACAGCAAATC-3'

TDR4R

5'-GCATGTCTTTGAAAGCAAGTACAC-3'
